# Supplementary material
Source: publisher site journal article supplement (https://www.dovepress.com/get_supplementary_file.php?f=287931-Table-S2.xlsx)
Supplement: Supplementary file 1 [file get_supplementary_file.php]

## Sheet: BP terms
Sheet 1. 140 terms of biological process (BP)
ID	Description	GeneRatio	BgRatio	pvalue	p.adjust	qvalue	geneID	Count
GO:0002446	neutrophil mediated immunity	31/340	499/18493	3.64056e-09	7.0265e-06	6.2435e-06	CKAP4/DDOST/TXNDC5/PSMC2/GLB1/SURF4/FUCA2/PGM2/CMTM6/MAGT1/CANT1/WDR1/NFKB1/MLEC/ERP44/CD58/ANXA2/TICAM2/PYGL/NEU1/ARPC5/RAP2B/SDCBP/PRDX4/IGF2R/PSMD12/DNAJC3/NRAS/IRAK4/PSMD11/NCSTN	31
GO:0006457	protein folding	20/340	218/18493	4.04869e-09	7.0265e-06	6.2435e-06	HSPA5/PDIA6/PPIC/HSP90B1/FKBP9/LMAN1/MLEC/SELENOF/ERP44/DERL1/PDIA5/GNAI3/P4HB/TOR1B/PRDX4/DNAJB11/LMAN2L/EMC1/DNAJC3/TOR1A	20
GO:0043312	neutrophil degranulation	29/340	485/18493	2.75982e-08	2.73906e-05	2.43383e-05	CKAP4/DDOST/TXNDC5/PSMC2/GLB1/SURF4/FUCA2/PGM2/CMTM6/MAGT1/CANT1/NFKB1/MLEC/ERP44/CD58/ANXA2/TICAM2/PYGL/NEU1/ARPC5/RAP2B/SDCBP/PRDX4/IGF2R/PSMD12/DNAJC3/NRAS/PSMD11/NCSTN	29
GO:0002283	neutrophil activation involved in immune response	29/340	488/18493	3.15651e-08	2.73906e-05	2.43383e-05	CKAP4/DDOST/TXNDC5/PSMC2/GLB1/SURF4/FUCA2/PGM2/CMTM6/MAGT1/CANT1/NFKB1/MLEC/ERP44/CD58/ANXA2/TICAM2/PYGL/NEU1/ARPC5/RAP2B/SDCBP/PRDX4/IGF2R/PSMD12/DNAJC3/NRAS/PSMD11/NCSTN	29
GO:0009101	glycoprotein biosynthetic process	23/340	326/18493	4.13279e-08	2.8334e-05	2.51766e-05	RPN2/OSTC/DDOST/STT3A/EXT2/POFUT1/RPN1/PMM2/C1GALT1C1/ALG2/MAGT1/CANT1/CHST14/MGAT2/PLOD3/GALNT2/B3GNT5/EXT1/DPY19L1/ATP7A/B4GALT5/CHPF2/DPM1	23
GO:0042119	neutrophil activation	29/340	498/18493	4.89784e-08	2.8334e-05	2.51766e-05	CKAP4/DDOST/TXNDC5/PSMC2/GLB1/SURF4/FUCA2/PGM2/CMTM6/MAGT1/CANT1/NFKB1/MLEC/ERP44/CD58/ANXA2/TICAM2/PYGL/NEU1/ARPC5/RAP2B/SDCBP/PRDX4/IGF2R/PSMD12/DNAJC3/NRAS/PSMD11/NCSTN	29
GO:0035966	response to topologically incorrect protein	17/340	189/18493	8.06192e-08	3.64049e-05	3.23482e-05	HSPA5/PDIA6/TBL2/HSP90B1/XBP1/SERPINH1/PTPN1/ERP44/SHC1/DERL1/PDIA5/SRPRA/BAK1/TOR1B/DNAJB11/DNAJC3/TOR1A	17
GO:0009100	glycoprotein metabolic process	25/340	394/18493	8.39065e-08	3.64049e-05	3.23482e-05	RPN2/OSTC/DDOST/STT3A/EXT2/POFUT1/RPN1/PMM2/GANAB/C1GALT1C1/ALG2/MAGT1/CANT1/CHST14/MGAT2/PLOD3/ERP44/GALNT2/B3GNT5/EXT1/DPY19L1/ATP7A/B4GALT5/CHPF2/DPM1	25
GO:0006986	response to unfolded protein	16/340	169/18493	9.57956e-08	3.69452e-05	3.28282e-05	HSPA5/PDIA6/TBL2/HSP90B1/XBP1/SERPINH1/PTPN1/ERP44/SHC1/DERL1/PDIA5/SRPRA/BAK1/TOR1B/DNAJB11/DNAJC3	16
GO:0036498	IRE1-mediated unfolded protein response	10/340	62/18493	1.7806e-07	5.8432e-05	5.19207e-05	HSPA5/PDIA6/XBP1/PTPN1/SHC1/PDIA5/SRPRA/BAK1/DNAJB11/DNAJC3	10
GO:0006486	protein glycosylation	19/340	250/18493	2.02799e-07	5.8432e-05	5.19207e-05	RPN2/OSTC/DDOST/STT3A/EXT2/POFUT1/RPN1/PMM2/C1GALT1C1/ALG2/MAGT1/MGAT2/PLOD3/GALNT2/B3GNT5/EXT1/DPY19L1/B4GALT5/DPM1	19
GO:0043413	macromolecule glycosylation	19/340	250/18493	2.02799e-07	5.8432e-05	5.19207e-05	RPN2/OSTC/DDOST/STT3A/EXT2/POFUT1/RPN1/PMM2/C1GALT1C1/ALG2/MAGT1/MGAT2/PLOD3/GALNT2/B3GNT5/EXT1/DPY19L1/B4GALT5/DPM1	19
GO:0030968	endoplasmic reticulum unfolded protein response	13/340	116/18493	2.18847e-07	5.8432e-05	5.19207e-05	HSPA5/PDIA6/TBL2/HSP90B1/XBP1/PTPN1/SHC1/DERL1/PDIA5/SRPRA/BAK1/DNAJB11/DNAJC3	13
GO:0018279	protein N-linked glycosylation via asparagine	7/340	25/18493	2.41378e-07	5.98446e-05	5.31758e-05	RPN2/OSTC/DDOST/STT3A/RPN1/MAGT1/MGAT2	7
GO:0018196	peptidyl-asparagine modification	7/340	26/18493	3.25121e-07	7.5233e-05	6.68494e-05	RPN2/OSTC/DDOST/STT3A/RPN1/MAGT1/MGAT2	7
GO:0070085	glycosylation	19/340	259/18493	3.50507e-07	7.60382e-05	6.75649e-05	RPN2/OSTC/DDOST/STT3A/EXT2/POFUT1/RPN1/PMM2/C1GALT1C1/ALG2/MAGT1/MGAT2/PLOD3/GALNT2/B3GNT5/EXT1/DPY19L1/B4GALT5/DPM1	19
GO:0035967	cellular response to topologically incorrect protein	14/340	151/18493	7.88168e-07	0.000160925	0.000142993	HSPA5/PDIA6/TBL2/HSP90B1/XBP1/PTPN1/SHC1/DERL1/PDIA5/SRPRA/BAK1/DNAJB11/DNAJC3/TOR1A	14
GO:0034620	cellular response to unfolded protein	13/340	133/18493	1.07305e-06	0.00020692	0.000183862	HSPA5/PDIA6/TBL2/HSP90B1/XBP1/PTPN1/SHC1/DERL1/PDIA5/SRPRA/BAK1/DNAJB11/DNAJC3	13
GO:1901987	regulation of cell cycle phase transition	23/340	412/18493	2.54578e-06	0.000465074	0.000413249	HUS1/AURKA/CCNB1/E2F8/CDC6/DLGAP5/FAM83D/PCNA/BUB1/CUL1/E2F7/TPX2/KANK2/ODF2/NEDD1/CASP2/HMMR/BRCA1/TUBG1/NEK6/NDC80/H2AFY/DYRK3	23
GO:0006487	protein N-linked glycosylation	9/340	72/18493	6.63603e-06	0.00115168	0.00102335	RPN2/OSTC/DDOST/STT3A/RPN1/PMM2/ALG2/MAGT1/MGAT2	9
GO:0034976	response to endoplasmic reticulum stress	17/340	264/18493	8.44232e-06	0.00139539	0.0012399	HSPA5/PDIA6/TBL2/HSP90B1/XBP1/PTPN1/ERP44/SHC1/DERL1/PDIA5/SRPRA/BAK1/TMX1/P4HB/DNAJB11/DNAJC3/TOR1A	17
GO:0044839	cell cycle G2/M phase transition	15/340	218/18493	1.31126e-05	0.00206882	0.00183828	HUS1/AURKA/CCNB1/CDC6/CUL1/TPX2/ODF2/NEDD1/HMMR/BRCA1/TUBG1/BORA/H2AFY/DYRK3/FOXM1	15
GO:1902749	regulation of cell cycle G2/M phase transition	13/340	170/18493	1.62459e-05	0.00245172	0.00217851	HUS1/AURKA/CCNB1/CDC6/CUL1/TPX2/ODF2/NEDD1/HMMR/BRCA1/TUBG1/H2AFY/DYRK3	13
GO:0044843	cell cycle G1/S phase transition	17/340	282/18493	1.9892e-05	0.00277499	0.00246576	AURKA/CCNB1/E2F8/CDC6/CDKN3/MCM8/PRIM2/FAM83D/PCNA/ITGB1/CUL1/MCM3/E2F7/KANK2/TYMS/CASP2/MCM6	17
GO:0007059	chromosome segregation	18/340	312/18493	2.05181e-05	0.00277499	0.00246576	CCNB1/CDC6/DLGAP5/KIF4A/SKA1/NUP62/FAM83D/BUB1/SGO2/BRCA1/KIF18A/TUBG1/NDC1/PHF13/NEK6/MIS18A/NDC80/H2AFY	18
GO:2000644	regulation of receptor catabolic process	4/340	10/18493	2.15998e-05	0.00277499	0.00246576	PTPN1/ANXA2/DTX3L/FURIN	4
GO:0030330	DNA damage response, signal transduction by p53 class mediator	10/340	104/18493	2.18508e-05	0.00277499	0.00246576	AURKA/CCNB1/E2F8/PCNA/E2F7/ZMPSTE24/CASP2/BRCA1/DYRK3/FOXM1	10
GO:1901990	regulation of mitotic cell cycle phase transition	20/340	375/18493	2.23854e-05	0.00277499	0.00246576	HUS1/AURKA/CCNB1/E2F8/CDC6/DLGAP5/PCNA/BUB1/CUL1/E2F7/TPX2/KANK2/ODF2/NEDD1/CASP2/HMMR/BRCA1/TUBG1/NEK6/NDC80	20
GO:0000070	mitotic sister chromatid segregation	12/340	153/18493	2.66981e-05	0.00319548	0.00283939	CCNB1/CDC6/DLGAP5/KIF4A/NUP62/BUB1/KIF18A/TUBG1/PHF13/NEK6/NDC80/H2AFY	12
GO:0000082	G1/S transition of mitotic cell cycle	16/340	263/18493	3.11849e-05	0.00353243	0.00313879	AURKA/CCNB1/E2F8/CDC6/CDKN3/MCM8/PRIM2/PCNA/ITGB1/CUL1/MCM3/E2F7/KANK2/TYMS/CASP2/MCM6	16
GO:0043123	positive regulation of I-kappaB kinase/NF-kappaB signaling	13/340	181/18493	3.15486e-05	0.00353243	0.00313879	CANT1/MYD88/TRIM5/NUP62/RIPK1/FADD/CASP8/TICAM2/TIFA/MUL1/BCL10/NEK6/IRAK4	13
GO:1901988	negative regulation of cell cycle phase transition	14/340	211/18493	3.79811e-05	0.00411976	0.00366068	HUS1/AURKA/CCNB1/E2F8/CDC6/PCNA/BUB1/CUL1/E2F7/KANK2/CASP2/BRCA1/NDC80/H2AFY	14
GO:0000819	sister chromatid segregation	13/340	185/18493	3.96382e-05	0.00416922	0.00370463	CCNB1/CDC6/DLGAP5/KIF4A/NUP62/BUB1/SGO2/KIF18A/TUBG1/PHF13/NEK6/NDC80/H2AFY	13
GO:0031638	zymogen activation	7/340	52/18493	4.3874e-05	0.00447902	0.00397991	MMP14/PGK1/ANXA2/FADD/BAK1/CASP8/FURIN	7
GO:0001889	liver development	11/340	137/18493	4.65e-05	0.00461147	0.0040976	AURKA/E2F8/XBP1/PCNA/ARF6/E2F7/TYMS/ZMPSTE24/HFE/ATP7A/IGF2R	11
GO:0045088	regulation of innate immune response	19/340	365/18493	4.97627e-05	0.00479795	0.00426329	HSP90B1/MYD88/NFKB1/TRIM5/PTPN1/RIPK1/NMI/FADD/IFNGR2/CASP8/TICAM2/TIFA/MUL1/CGAS/BCL10/HFE/NRAS/IRAK4/PLSCR1	19
GO:1901991	negative regulation of mitotic cell cycle phase transition	13/340	191/18493	5.51539e-05	0.00517403	0.00459746	HUS1/AURKA/CCNB1/E2F8/CDC6/PCNA/BUB1/CUL1/E2F7/KANK2/CASP2/BRCA1/NDC80	13
GO:0061008	hepaticobiliary system development	11/340	140/18493	5.67116e-05	0.00518016	0.00460291	AURKA/E2F8/XBP1/PCNA/ARF6/E2F7/TYMS/ZMPSTE24/HFE/ATP7A/IGF2R	11
GO:0007093	mitotic cell cycle checkpoint	12/340	166/18493	5.9508e-05	0.00529621	0.00470603	HUS1/AURKA/CCNB1/E2F8/CDC6/PCNA/BUB1/E2F7/CASP2/BRCA1/NDC80/MAP3K20	12
GO:0043122	regulation of I-kappaB kinase/NF-kappaB signaling	14/340	226/18493	7.99643e-05	0.0069389	0.00616567	CANT1/MYD88/TRIM5/NUP62/RIPK1/HDAC1/FADD/CASP8/TICAM2/TIFA/MUL1/BCL10/NEK6/IRAK4	14
GO:0000086	G2/M transition of mitotic cell cycle	13/340	199/18493	8.3888e-05	0.00710184	0.00631045	HUS1/AURKA/CCNB1/CDC6/CUL1/TPX2/ODF2/NEDD1/HMMR/BRCA1/TUBG1/BORA/FOXM1	13
GO:0007249	I-kappaB kinase/NF-kappaB signaling	15/340	258/18493	9.16672e-05	0.00739946	0.00657491	CANT1/MYD88/TRIM5/NUP62/RIPK1/HDAC1/FADD/CASP8/TICAM2/TIFA/MUL1/BCL10/PRDX4/NEK6/IRAK4	15
GO:0098813	nuclear chromosome segregation	15/340	258/18493	9.16672e-05	0.00739946	0.00657491	CCNB1/CDC6/DLGAP5/KIF4A/NUP62/FAM83D/BUB1/SGO2/KIF18A/TUBG1/NDC1/PHF13/NEK6/NDC80/H2AFY	15
GO:0006261	DNA-dependent DNA replication	11/340	148/18493	9.383e-05	0.00740191	0.00657708	E2F8/CDC6/PRIM2/PCNA/MCM3/E2F7/WDHD1/ZMPSTE24/MCM6/POLD3/GINS1	11
GO:0006012	galactose metabolic process	4/340	14/18493	9.71256e-05	0.00749162	0.0066568	GLB1/PGM2/GALM/SLC35A2	4
GO:0010389	regulation of G2/M transition of mitotic cell cycle	11/340	153/18493	0.000126275	0.00952826	0.00846648	HUS1/AURKA/CCNB1/CDC6/CUL1/TPX2/ODF2/NEDD1/HMMR/BRCA1/TUBG1	11
GO:0044786	cell cycle DNA replication	7/340	62/18493	0.000137837	0.0101022	0.00897648	E2F8/PRIM2/PCNA/E2F7/ZMPSTE24/POLD3/GINS1	7
GO:0006260	DNA replication	15/340	268/18493	0.000139702	0.0101022	0.00897648	HUS1/E2F8/CDC6/MCM8/PRIM2/PCNA/MCM3/E2F7/WDHD1/ZMPSTE24/GRWD1/BRCA1/MCM6/POLD3/GINS1	15
GO:0042770	signal transduction in response to DNA damage	10/340	130/18493	0.00014646	0.0103747	0.00921861	AURKA/CCNB1/E2F8/PCNA/E2F7/ZMPSTE24/CASP2/BRCA1/DYRK3/FOXM1	10
GO:0034975	protein folding in endoplasmic reticulum	4/340	16/18493	0.000171525	0.0119073	0.0105804	HSPA5/HSP90B1/EMC1/DNAJC3	4
GO:0006890	retrograde vesicle-mediated transport, Golgi to ER	8/340	86/18493	0.000183477	0.0124873	0.0110957	KDELR2/SURF4/KIF4A/TMED9/TMED2/KIF18A/BET1L/COPB2	8
GO:0140014	mitotic nuclear division	15/340	277/18493	0.000200319	0.0133713	0.0118812	AURKA/CCNB1/CDC6/DLGAP5/KIF4A/NUP62/BUB1/TPX2/KIF18A/TUBG1/BORA/PHF13/NEK6/NDC80/H2AFY	15
GO:0072331	signal transduction by p53 class mediator	13/340	218/18493	0.000208363	0.0136458	0.0121252	AURKA/CCNB1/E2F8/PCNA/E2F7/TPX2/ZMPSTE24/CASP2/BRCA1/TP53RK/DYRK3/FOXM1/BCL2L12	13
GO:0045454	cell redox homeostasis	7/340	67/18493	0.00022536	0.0144857	0.0128715	PDIA6/TXNDC5/ERP44/PDIA5/TMX1/P4HB/PRDX4	7
GO:0045930	negative regulation of mitotic cell cycle	15/340	281/18493	0.000233852	0.0147582	0.0131136	HUS1/AURKA/CCNB1/E2F8/CDC6/PCNA/BUB1/CUL1/E2F7/KANK2/CASP2/BRCA1/BTG3/NDC80/MAP3K20	15
GO:0033047	regulation of mitotic sister chromatid segregation	7/340	68/18493	0.000247316	0.0153292	0.013621	CCNB1/CDC6/DLGAP5/BUB1/NEK6/NDC80/H2AFY	7
GO:0051607	defense response to virus	13/340	228/18493	0.000322152	0.0196173	0.0174313	ZC3HAV1/TRIM5/IL10RB/FADD/DTX3L/MUL1/RNF216/ZMPSTE24/CGAS/DNAJC3/NT5C3A/APOBEC3C/PLSCR1	13
GO:0030071	regulation of mitotic metaphase/anaphase transition	6/340	51/18493	0.000331442	0.0198351	0.0176248	CCNB1/CDC6/DLGAP5/BUB1/NEK6/NDC80	6
GO:0032801	receptor catabolic process	5/340	34/18493	0.000366164	0.0208462	0.0185232	PTPN1/ANXA2/SH3GLB1/DTX3L/FURIN	5
GO:0070266	necroptotic process	5/340	34/18493	0.000366164	0.0208462	0.0185232	RIPK1/FADD/CASP8/TICAM2/PYGL	5
GO:0030199	collagen fibril organization	6/340	52/18493	0.000368951	0.0208462	0.0185232	COLGALT1/SERPINH1/PLOD3/ANXA2/P4HA1/ATP7A	6
GO:0048193	Golgi vesicle transport	17/340	359/18493	0.000375045	0.0208462	0.0185232	KDELR2/SURF4/SEC24D/LMAN1/KIF4A/TMED9/CAPZA1/SEC22A/LYPLA1/TICAM2/TMED2/KIF18A/BET1L/IGF2R/LMAN2L/NRBP1/COPB2	17
GO:0072401	signal transduction involved in DNA integrity checkpoint	7/340	73/18493	0.000384372	0.0208462	0.0185232	AURKA/CCNB1/E2F8/PCNA/E2F7/CASP2/BRCA1	7
GO:0072422	signal transduction involved in DNA damage checkpoint	7/340	73/18493	0.000384372	0.0208462	0.0185232	AURKA/CCNB1/E2F8/PCNA/E2F7/CASP2/BRCA1	7
GO:0071496	cellular response to external stimulus	16/340	328/18493	0.000400947	0.0213334	0.0189562	HSPA5/TBL2/HSP90B1/MYD88/XBP1/NFKB1/FADD/BAK1/SH3GLB1/CASP8/KANK2/DAP/RRAGC/CASP2/BCL10/HFE	16
GO:1902099	regulation of metaphase/anaphase transition of cell cycle	6/340	53/18493	0.000409698	0.0213334	0.0189562	CCNB1/CDC6/DLGAP5/BUB1/NEK6/NDC80	6
GO:0000271	polysaccharide biosynthetic process	7/340	74/18493	0.000417941	0.0213334	0.0189562	EXT2/PGM2/NFKB1/B3GNT5/PPP1R3B/EXT1/B4GALT5	7
GO:0072395	signal transduction involved in cell cycle checkpoint	7/340	74/18493	0.000417941	0.0213334	0.0189562	AURKA/CCNB1/E2F8/PCNA/E2F7/CASP2/BRCA1	7
GO:0007091	metaphase/anaphase transition of mitotic cell cycle	6/340	54/18493	0.000453875	0.0228319	0.0202876	CCNB1/CDC6/DLGAP5/BUB1/NEK6/NDC80	6
GO:0016052	carbohydrate catabolic process	10/340	152/18493	0.000517011	0.0252874	0.0224695	GLB1/PGM2/LDHA/PGK1/STAT3/PPP1R3B/PYGL/NEU1/GALM/CTBS	10
GO:0016556	mRNA modification	4/340	21/18493	0.000524544	0.0252874	0.0224695	TRMT6/WTAP/PUS7/DKC1	4
GO:0036344	platelet morphogenesis	4/340	21/18493	0.000524544	0.0252874	0.0224695	C1GALT1C1/WDR1/CASP3/MYH9	4
GO:0016572	histone phosphorylation	5/340	37/18493	0.000548326	0.0253544	0.022529	AURKA/CCNB1/ZMPSTE24/H2AFY/BAZ1B	5
GO:0006977	DNA damage response, signal transduction by p53 class mediator resulting in cell cycle arrest	6/340	56/18493	0.00055331	0.0253544	0.022529	AURKA/CCNB1/E2F8/PCNA/E2F7/CASP2	6
GO:0044784	metaphase/anaphase transition of cell cycle	6/340	56/18493	0.00055331	0.0253544	0.022529	CCNB1/CDC6/DLGAP5/BUB1/NEK6/NDC80	6
GO:0006888	ER to Golgi vesicle-mediated transport	12/340	211/18493	0.000555152	0.0253544	0.022529	KDELR2/SEC24D/LMAN1/TMED9/CAPZA1/SEC22A/TICAM2/TMED2/BET1L/LMAN2L/NRBP1/COPB2	12
GO:0071260	cellular response to mechanical stimulus	7/340	78/18493	0.000576377	0.0259819	0.0230866	MYD88/NFKB1/FADD/BAK1/CASP8/CASP2/BCL10	7
GO:0010965	regulation of mitotic sister chromatid separation	6/340	57/18493	0.000608975	0.0264219	0.0234776	CCNB1/CDC6/DLGAP5/BUB1/NEK6/NDC80	6
GO:0072431	signal transduction involved in mitotic G1 DNA damage checkpoint	6/340	57/18493	0.000608975	0.0264219	0.0234776	AURKA/CCNB1/E2F8/PCNA/E2F7/CASP2	6
GO:1902400	intracellular signal transduction involved in G1 DNA damage checkpoint	6/340	57/18493	0.000608975	0.0264219	0.0234776	AURKA/CCNB1/E2F8/PCNA/E2F7/CASP2	6
GO:0045089	positive regulation of innate immune response	15/340	309/18493	0.000635192	0.0268002	0.0238137	HSP90B1/MYD88/NFKB1/TRIM5/RIPK1/FADD/CASP8/TICAM2/TIFA/CGAS/BCL10/HFE/NRAS/IRAK4/PLSCR1	15
GO:0016485	protein processing	15/340	310/18493	0.000656611	0.0268002	0.0238137	MMP14/CASP3/PGK1/ANXA2/FADD/BAK1/MYH9/CASP8/ZMPSTE24/ECE1/CASP2/CAST/FURIN/BCL2L12/NCSTN	15
GO:0051604	protein maturation	17/340	378/18493	0.000671562	0.0268002	0.0238137	MMP14/CASP3/SERPINH1/PGK1/ANXA2/FADD/BAK1/MYH9/CASP8/ZMPSTE24/ECE1/CASP2/CAST/FURIN/PRDX4/BCL2L12/NCSTN	17
GO:0019388	galactose catabolic process	3/340	10/18493	0.000671574	0.0268002	0.0238137	GLB1/PGM2/GALM	3
GO:0032025	response to cobalt ion	3/340	10/18493	0.000671574	0.0268002	0.0238137	CASP3/CASP8/ATP7A	3
GO:0036500	ATF6-mediated unfolded protein response	3/340	10/18493	0.000671574	0.0268002	0.0238137	HSPA5/HSP90B1/XBP1	3
GO:0033045	regulation of sister chromatid segregation	7/340	80/18493	0.000671742	0.0268002	0.0238137	CCNB1/CDC6/DLGAP5/BUB1/NEK6/NDC80/H2AFY	7
GO:0000075	cell cycle checkpoint	12/340	216/18493	0.00068299	0.0269393	0.0239373	HUS1/AURKA/CCNB1/E2F8/CDC6/PCNA/BUB1/E2F7/CASP2/BRCA1/NDC80/MAP3K20	12
GO:0031570	DNA integrity checkpoint	10/340	158/18493	0.000699536	0.0270762	0.024059	HUS1/AURKA/CCNB1/E2F8/CDC6/PCNA/E2F7/CASP2/BRCA1/MAP3K20	10
GO:0097300	programmed necrotic cell death	5/340	39/18493	0.000702843	0.0270762	0.024059	RIPK1/FADD/CASP8/TICAM2/PYGL	5
GO:0033619	membrane protein proteolysis	6/340	59/18493	0.000733265	0.0270762	0.024059	SPPL2A/NFKB1/ADAM9/MYH9/FURIN/NCSTN	6
GO:0072413	signal transduction involved in mitotic cell cycle checkpoint	6/340	59/18493	0.000733265	0.0270762	0.024059	AURKA/CCNB1/E2F8/PCNA/E2F7/CASP2	6
GO:1902402	signal transduction involved in mitotic DNA damage checkpoint	6/340	59/18493	0.000733265	0.0270762	0.024059	AURKA/CCNB1/E2F8/PCNA/E2F7/CASP2	6
GO:1902403	signal transduction involved in mitotic DNA integrity checkpoint	6/340	59/18493	0.000733265	0.0270762	0.024059	AURKA/CCNB1/E2F8/PCNA/E2F7/CASP2	6
GO:0071158	positive regulation of cell cycle arrest	7/340	82/18493	0.000779202	0.028338	0.0251801	AURKA/CCNB1/E2F8/PCNA/E2F7/CASP2/BRCA1	7
GO:0051306	mitotic sister chromatid separation	6/340	60/18493	0.000802329	0.028338	0.0251801	CCNB1/CDC6/DLGAP5/BUB1/NEK6/NDC80	6
GO:1902750	negative regulation of cell cycle G2/M phase transition	6/340	60/18493	0.000802329	0.028338	0.0251801	HUS1/AURKA/CDC6/CUL1/BRCA1/H2AFY	6
GO:0044774	mitotic DNA integrity checkpoint	8/340	107/18493	0.000808256	0.028338	0.0251801	HUS1/AURKA/CCNB1/E2F8/CDC6/PCNA/E2F7/CASP2	8
GO:0071156	regulation of cell cycle arrest	8/340	107/18493	0.000808256	0.028338	0.0251801	AURKA/CCNB1/E2F8/PCNA/E2F7/CASP2/BRCA1/FOXM1	8
GO:0002218	activation of innate immune response	13/340	252/18493	0.00082699	0.0287048	0.0255061	HSP90B1/MYD88/NFKB1/TRIM5/RIPK1/FADD/CASP8/TICAM2/TIFA/CGAS/BCL10/NRAS/IRAK4	13
GO:0007052	mitotic spindle organization	8/340	108/18493	0.000859236	0.0295288	0.0262383	AURKA/CCNB1/KIF4A/NUP62/TPX2/TUBG1/BORA/NDC80	8
GO:0090068	positive regulation of cell cycle process	14/340	286/18493	0.000880849	0.0299748	0.0266345	AURKA/CCNB1/E2F8/CDC6/DLGAP5/NUP62/FAM83D/PCNA/E2F7/CASP2/BRCA1/NDC80/H2AFY/DYRK3	14
GO:0035666	TRIF-dependent toll-like receptor signaling pathway	4/340	24/18493	0.000891681	0.0300488	0.0267003	RIPK1/FADD/CASP8/TICAM2	4
GO:0071281	cellular response to iron ion	3/340	11/18493	0.00091087	0.0301734	0.026811	CCNB1/HFE/ATP7A	3
GO:0005976	polysaccharide metabolic process	8/340	109/18493	0.000912765	0.0301734	0.026811	EXT2/PGM2/NFKB1/B3GNT5/PPP1R3B/PYGL/EXT1/B4GALT5	8
GO:1905818	regulation of chromosome separation	6/340	62/18493	0.000955427	0.0312857	0.0277994	CCNB1/CDC6/DLGAP5/BUB1/NEK6/NDC80	6
GO:0007051	spindle organization	10/340	165/18493	0.000976536	0.0316781	0.0281481	AURKA/CCNB1/KIF4A/NUP62/MYH9/TPX2/TUBG1/BORA/NEK6/NDC80	10
GO:0006509	membrane protein ectodomain proteolysis	5/340	42/18493	0.000992767	0.0319064	0.0283509	SPPL2A/ADAM9/MYH9/FURIN/NCSTN	5
GO:0031571	mitotic G1 DNA damage checkpoint	6/340	63/18493	0.00103993	0.0327173	0.0290715	AURKA/CCNB1/E2F8/PCNA/E2F7/CASP2	6
GO:0044819	mitotic G1/S transition checkpoint	6/340	63/18493	0.00103993	0.0327173	0.0290715	AURKA/CCNB1/E2F8/PCNA/E2F7/CASP2	6
GO:1900101	regulation of endoplasmic reticulum unfolded protein response	4/340	25/18493	0.00104627	0.0327173	0.0290715	HSPA5/XBP1/PTPN1/BAK1	4
GO:0006022	aminoglycan metabolic process	10/340	167/18493	0.00107039	0.0331724	0.0294759	EXT2/GLB1/CHST14/NFKB1/B3GNT5/EXT1/HMMR/CTBS/B4GALT5/CHPF2	10
GO:0044783	G1 DNA damage checkpoint	6/340	64/18493	0.00113005	0.0347116	0.0308436	AURKA/CCNB1/E2F8/PCNA/E2F7/CASP2	6
GO:0006919	activation of cysteine-type endopeptidase activity involved in apoptotic process	7/340	88/18493	0.00118494	0.0358474	0.0318527	CASP3/RIPK1/FADD/BAK1/CASP8/DAP/MUL1	7
GO:0045579	positive regulation of B cell differentiation	3/340	12/18493	0.00119801	0.0358474	0.0318527	MMP14/XBP1/ATP11C	3
GO:1903894	regulation of IRE1-mediated unfolded protein response	3/340	12/18493	0.00119801	0.0358474	0.0318527	HSPA5/PTPN1/BAK1	3
GO:0043062	extracellular structure organization	17/340	402/18493	0.00131594	0.0387186	0.034404	MMP14/LAMC1/COLGALT1/SH3PXD2B/SERPINH1/PLOD3/ANXA2/ITGB1/P4HA1/ITGA5/PLAGL2/ADAM12/P4HB/FURIN/SDCBP/ATP7A/PRDX4	17
GO:0002758	innate immune response-activating signal transduction	12/340	233/18493	0.00131628	0.0387186	0.034404	HSP90B1/MYD88/NFKB1/TRIM5/RIPK1/FADD/CASP8/TICAM2/TIFA/BCL10/NRAS/IRAK4	12
GO:0002756	MyD88-independent toll-like receptor signaling pathway	4/340	27/18493	0.00141018	0.0411322	0.0365487	RIPK1/FADD/CASP8/TICAM2	4
GO:0043900	regulation of multi-organism process	16/340	371/18493	0.00148107	0.04284	0.0380662	AURKA/FUCA2/ZC3HAV1/TRIM5/HDAC1/ANXA2/SYDE1/DTX3L/MUL1/RNF216/ZMPSTE24/CGAS/P4HB/PRDX4/APOBEC3C/PLSCR1	16
GO:0032757	positive regulation of interleukin-8 production	5/340	46/18493	0.00150677	0.0430879	0.0382864	MYD88/RIPK1/CD58/FADD/BCL10	5
GO:0000212	meiotic spindle organization	3/340	13/18493	0.0015363	0.0430879	0.0382864	AURKA/MYH9/TUBG1	3
GO:1900103	positive regulation of endoplasmic reticulum unfolded protein response	3/340	13/18493	0.0015363	0.0430879	0.0382864	XBP1/PTPN1/BAK1	3
GO:0000077	DNA damage checkpoint	9/340	146/18493	0.00153939	0.0430879	0.0382864	HUS1/AURKA/CCNB1/E2F8/PCNA/E2F7/CASP2/BRCA1/MAP3K20	9
GO:0033692	cellular polysaccharide biosynthetic process	6/340	68/18493	0.00155171	0.0430879	0.0382864	EXT2/PGM2/B3GNT5/PPP1R3B/EXT1/B4GALT5	6
GO:0010948	negative regulation of cell cycle process	14/340	304/18493	0.0015724	0.0433159	0.038489	HUS1/AURKA/CCNB1/E2F8/CDC6/PCNA/BUB1/CUL1/E2F7/KANK2/CASP2/BRCA1/NDC80/H2AFY	14
GO:0044030	regulation of DNA methylation	4/340	28/18493	0.00162162	0.0439737	0.0390735	MBD2/ZMPSTE24/BRCA1/MIS18A	4
GO:0051984	positive regulation of chromosome segregation	4/340	28/18493	0.00162162	0.0439737	0.0390735	CCNB1/CDC6/DLGAP5/H2AFY	4
GO:0007088	regulation of mitotic nuclear division	10/340	177/18493	0.00165692	0.044352	0.0394096	AURKA/CCNB1/CDC6/DLGAP5/NUP62/BUB1/BORA/NEK6/NDC80/H2AFY	10
GO:0035722	interleukin-12-mediated signaling pathway	5/340	47/18493	0.00166112	0.044352	0.0394096	MSN/ANXA2/CAPZA1/P4HB/HNRNPF	5
GO:0007050	cell cycle arrest	12/340	241/18493	0.00175046	0.0463805	0.0412121	AURKA/CCNB1/E2F8/CDKN3/PCNA/CUL1/E2F7/RRAGC/CASP2/BRCA1/MAP3K20/FOXM1	12
GO:0002221	pattern recognition receptor signaling pathway	10/340	179/18493	0.00180077	0.0473521	0.0420754	HSP90B1/MYD88/TRIM5/RIPK1/FADD/CASP8/TICAM2/TIFA/BCL10/IRAK4	10
GO:0010972	negative regulation of G2/M transition of mitotic cell cycle	5/340	48/18493	0.00182677	0.0476747	0.0423621	HUS1/AURKA/CDC6/CUL1/BRCA1	5
GO:0000083	regulation of transcription involved in G1/S transition of mitotic cell cycle	4/340	29/18493	0.00185412	0.0480272	0.0426753	CDC6/PCNA/E2F7/TYMS	4
GO:0000280	nuclear division	17/340	416/18493	0.00189182	0.0486407	0.0432205	AURKA/CCNB1/CDC6/DLGAP5/KIF4A/NUP62/BUB1/TPX2/SGO2/KIF18A/TUBG1/NDC1/BORA/PHF13/NEK6/NDC80/H2AFY	17
GO:0045651	positive regulation of macrophage differentiation	3/340	14/18493	0.0019288	0.0488532	0.0434092	RIPK1/FADD/CASP8	3
GO:0097202	activation of cysteine-type endopeptidase activity	3/340	14/18493	0.0019288	0.0488532	0.0434092	FADD/BAK1/CASP8	3
GO:0001701	in utero embryonic development	14/340	311/18493	0.0019423	0.0488532	0.0434092	SLC39A1/NCAPG2/SEC24D/CCNB1/E2F8/PLOD3/UBE2A/ITGB1/E2F7/MYH9/CASP8/TMED2/ATP7A/GINS1	14
GO:0006998	nuclear envelope organization	5/340	49/18493	0.0020042	0.0496899	0.0441527	CCNB1/ZMPSTE24/TOR1B/NEK6/TOR1A	5
GO:0071349	cellular response to interleukin-12	5/340	49/18493	0.0020042	0.0496899	0.0441527	MSN/ANXA2/CAPZA1/P4HB/HNRNPF	5

## Sheet: CC terms
Sheet 2. 56 terms of cellular component (CC)
ID	Description	GeneRatio	BgRatio	pvalue	p.adjust	qvalue	geneID	Count
GO:0005788	endoplasmic reticulum lumen	26/360	301/19659	6.48681e-11	2.76987e-08	2.1782e-08	CALU/HSPA5/CKAP4/PDIA6/KDELC2/TXNDC5/GANAB/FUCA2/LAMC1/COLGALT1/HSP90B1/GPX8/SERPINH1/SELENOF/TOR3A/ERP44/PDIA5/GPX7/P4HA1/P4HB/TOR1B/DNAJB11/H6PD/DNAJC3/TOR1A/FSTL1	26
GO:0042470	melanosome	14/360	106/19659	8.5513e-09	1.21714e-06	9.57146e-07	CALU/HSPA5/PDIA6/RPN1/MMP14/GANAB/HSP90B1/ANXA2/ITGB1/SLC1A5/P4HB/SYPL1/SDCBP/NCSTN	14
GO:0048770	pigment granule	14/360	106/19659	8.5513e-09	1.21714e-06	9.57146e-07	CALU/HSPA5/PDIA6/RPN1/MMP14/GANAB/HSP90B1/ANXA2/ITGB1/SLC1A5/P4HB/SYPL1/SDCBP/NCSTN	14
GO:0008250	oligosaccharyltransferase complex	6/360	12/19659	3.04611e-08	3.25172e-06	2.55713e-06	RPN2/OSTC/DDOST/STT3A/RPN1/MAGT1	6
GO:0098589	membrane region	21/360	316/19659	4.19485e-07	3.5824e-05	2.81717e-05	CASP3/SERPINH1/PGK1/NUP62/EFNB1/RIPK1/MYO1C/ANXA2/FADD/ITGB1/CASP8/GNAI3/CAVIN1/BCL10/KIRREL1/KIF18A/RAP2B/FURIN/SDCBP/ATP7A/PLSCR1	21
GO:0045121	membrane raft	20/360	304/19659	9.28382e-07	5.96062e-05	4.68738e-05	CASP3/SERPINH1/PGK1/EFNB1/RIPK1/MYO1C/ANXA2/FADD/ITGB1/CASP8/GNAI3/CAVIN1/BCL10/KIRREL1/KIF18A/RAP2B/FURIN/SDCBP/ATP7A/PLSCR1	20
GO:0098857	membrane microdomain	20/360	305/19659	9.7715e-07	5.96062e-05	4.68738e-05	CASP3/SERPINH1/PGK1/EFNB1/RIPK1/MYO1C/ANXA2/FADD/ITGB1/CASP8/GNAI3/CAVIN1/BCL10/KIRREL1/KIF18A/RAP2B/FURIN/SDCBP/ATP7A/PLSCR1	20
GO:0005925	focal adhesion	23/360	402/19659	1.60762e-06	8.5807e-05	6.74779e-05	HSPA5/MMP14/MSN/HSP90B1/ADAM9/ARF6/TPM4/TES/TRIOBP/ITGB1/MYH9/ITGA5/FBLIM1/ACTN4/ARPC5/ANXA5/P4HB/PTPN12/SDCBP/REXO2/IGF2R/VASP/NCSTN	23
GO:0005924	cell-substrate adherens junction	23/360	405/19659	1.82333e-06	8.65069e-05	6.80284e-05	HSPA5/MMP14/MSN/HSP90B1/ADAM9/ARF6/TPM4/TES/TRIOBP/ITGB1/MYH9/ITGA5/FBLIM1/ACTN4/ARPC5/ANXA5/P4HB/PTPN12/SDCBP/REXO2/IGF2R/VASP/NCSTN	23
GO:0030055	cell-substrate junction	23/360	409/19659	2.15215e-06	9.18969e-05	7.2267e-05	HSPA5/MMP14/MSN/HSP90B1/ADAM9/ARF6/TPM4/TES/TRIOBP/ITGB1/MYH9/ITGA5/FBLIM1/ACTN4/ARPC5/ANXA5/P4HB/PTPN12/SDCBP/REXO2/IGF2R/VASP/NCSTN	23
GO:0005793	endoplasmic reticulum-Golgi intermediate compartment	11/360	123/19659	1.64909e-05	0.000572001	0.000449817	HSPA5/PDIA6/SURF4/LMAN1/SERPINH1/TMED9/ERP44/TICAM2/TMED2/P4HB/LMAN2L	11
GO:0060205	cytoplasmic vesicle lumen	19/360	338/19659	1.67135e-05	0.000572001	0.000449817	TXNDC5/PSMC2/GLB1/FUCA2/PGM2/CANT1/HSP90B1/NFKB1/ERP44/ANXA2/PYGL/NEU1/ACTN4/ARPC5/SDCBP/PRDX4/PSMD12/DNAJC3/PSMD11	19
GO:0031983	vesicle lumen	19/360	339/19659	1.74145e-05	0.000572001	0.000449817	TXNDC5/PSMC2/GLB1/FUCA2/PGM2/CANT1/HSP90B1/NFKB1/ERP44/ANXA2/PYGL/NEU1/ACTN4/ARPC5/SDCBP/PRDX4/PSMD12/DNAJC3/PSMD11	19
GO:0034774	secretory granule lumen	18/360	321/19659	2.87541e-05	0.000785202	0.000617477	TXNDC5/PSMC2/GLB1/FUCA2/PGM2/CANT1/NFKB1/ERP44/ANXA2/PYGL/NEU1/ACTN4/ARPC5/SDCBP/PRDX4/PSMD12/DNAJC3/PSMD11	18
GO:0005766	primary lysosome	12/360	155/19659	2.94221e-05	0.000785202	0.000617477	CKAP4/DDOST/TXNDC5/GLB1/SURF4/FUCA2/CMTM6/MAGT1/ANXA2/SDCBP/DNAJC3/NCSTN	12
GO:0042582	azurophil granule	12/360	155/19659	2.94221e-05	0.000785202	0.000617477	CKAP4/DDOST/TXNDC5/GLB1/SURF4/FUCA2/CMTM6/MAGT1/ANXA2/SDCBP/DNAJC3/NCSTN	12
GO:0034663	endoplasmic reticulum chaperone complex	4/360	11/19659	3.2965e-05	0.000828004	0.000651136	HSPA5/PDIA6/HSP90B1/P4HB	4
GO:0000940	condensed chromosome outer kinetochore	4/360	12/19659	4.87339e-05	0.00115608	0.00090913	CCNB1/SKA1/BUB1/NDC80	4
GO:0000775	chromosome, centromeric region	13/360	194/19659	6.26359e-05	0.00140766	0.00110697	AURKA/CCNB1/ERCC6L/CENPL/SKA1/CENPI/BUB1/SGO2/KIF18A/MIS18A/NDC80/H2AFY/BAZ1B	13
GO:0030496	midbody	12/360	172/19659	8.12503e-05	0.00173469	0.00136415	HSPA5/CEP55/AURKA/HSP90B1/KIF4A/NUP62/ANXA2/ARF6/SHCBP1/TRIOBP/SH3GLB1/GNAI3	12
GO:0043596	nuclear replication fork	6/360	42/19659	0.000108741	0.00221106	0.00173876	PRIM2/PCNA/MCM3/WDHD1/POLD3/BAZ1B	6
GO:0000922	spindle pole	11/360	154/19659	0.000129933	0.00252188	0.00198319	AURKA/CCNB1/CDC6/DLGAP5/NUP62/FAM83D/TPX2/ODF2/NEDD1/TUBG1/NEK6	11
GO:0005791	rough endoplasmic reticulum	8/360	86/19659	0.000179151	0.00332597	0.00261552	CKAP4/RPN2/RPN1/PLOD3/TRAM1/DERL1/SRPRA/TRAM2	8
GO:0000793	condensed chromosome	13/360	221/19659	0.000230712	0.00403055	0.00316959	HUS1/AURKA/NCAPG2/CCNB1/ERCC6L/SKA1/BUB1/SGO2/BRCA1/TUBG1/NDC80/H2AFY/BAZ1B	13
GO:0098687	chromosomal region	17/360	346/19659	0.000235981	0.00403055	0.00316959	AURKA/CCNB1/ERCC6L/HAT1/CENPL/SKA1/CENPI/PCNA/BUB1/MCM3/SGO2/MCM6/KIF18A/MIS18A/NDC80/H2AFY/BAZ1B	17
GO:0005798	Golgi-associated vesicle	11/360	175/19659	0.000394718	0.00648249	0.00509778	SEC24D/SPPL2A/LMAN1/TMED9/TICAM2/TMED2/FURIN/ATP7A/IGF2R/LMAN2L/COPB2	11
GO:0005774	vacuolar membrane	18/360	397/19659	0.000411945	0.00651483	0.00512321	CKAP4/RPN2/DDOST/SURF4/SPPL2A/CMTM6/MAGT1/ATP11C/CD164/ANXA2/SH3GLB1/DTX3L/RRAGC/NEU1/GNAI3/ECE1/IGF2R/NCSTN	18
GO:0005819	spindle	16/360	333/19659	0.000456893	0.00689614	0.00542307	AURKA/CCNB1/CDC6/DLGAP5/KIF4A/SKA1/NUP62/FAM83D/SHCBP1/MYH9/TPX2/ODF2/NEDD1/KIF18A/TUBG1/NEK6	16
GO:1904813	ficolin-1-rich granule lumen	9/360	124/19659	0.000468356	0.00689614	0.00542307	PSMC2/GLB1/PGM2/CANT1/PYGL/ARPC5/PRDX4/PSMD12/PSMD11	9
GO:0035577	azurophil granule membrane	6/360	58/19659	0.000656293	0.00934124	0.00734588	CKAP4/DDOST/SURF4/CMTM6/MAGT1/NCSTN	6
GO:0000780	condensed nuclear chromosome, centromeric region	4/360	24/19659	0.000879292	0.0120204	0.00945278	AURKA/CCNB1/BUB1/NDC80	4
GO:0042555	MCM complex	3/360	11/19659	0.000900829	0.0120204	0.00945278	MCM8/MCM3/MCM6	3
GO:0030667	secretory granule membrane	14/360	295/19659	0.00114831	0.0148585	0.0116846	CKAP4/DDOST/SURF4/CMTM6/MAGT1/MLEC/SLC30A5/CD58/TICAM2/TMED2/RAP2B/IGF2R/NRAS/NCSTN	14
GO:0032432	actin filament bundle	6/360	67/19659	0.00141017	0.0177101	0.0139271	TPM4/MYH9/FBLIM1/ACTN4/PLS3/TPM3	6
GO:0005657	replication fork	6/360	68/19659	0.00152322	0.0185581	0.014594	PRIM2/PCNA/MCM3/WDHD1/POLD3/BAZ1B	6
GO:0015629	actin cytoskeleton	19/360	483/19659	0.00156462	0.0185581	0.014594	ALG2/WDR1/SH3PXD2B/MYO1C/CAPZA1/TPM4/TRIOBP/MYH9/FBLIM1/ACTN4/CALD1/ARPC5/PLS3/HFE/PTPN12/TPM3/NDC1/VASP/MYL12A	19
GO:0030176	integral component of endoplasmic reticulum membrane	9/360	149/19659	0.00172967	0.0193961	0.0152529	HSPA5/TBL2/SPPL2A/XBP1/TRAM1/DERL1/EXT1/ZMPSTE24/EMC1	9
GO:0005765	lysosomal membrane	15/360	344/19659	0.00179502	0.0193961	0.0152529	CKAP4/DDOST/SURF4/SPPL2A/CMTM6/MAGT1/ATP11C/CD164/ANXA2/DTX3L/NEU1/GNAI3/ECE1/IGF2R/NCSTN	15
GO:0030894	replisome	4/360	29/19659	0.0018288	0.0193961	0.0152529	PRIM2/PCNA/MCM3/POLD3	4
GO:0098852	lytic vacuole membrane	15/360	345/19659	0.00184618	0.0193961	0.0152529	CKAP4/DDOST/SURF4/SPPL2A/CMTM6/MAGT1/ATP11C/CD164/ANXA2/DTX3L/NEU1/GNAI3/ECE1/IGF2R/NCSTN	15
GO:0042641	actomyosin	6/360	71/19659	0.00190401	0.0193961	0.0152529	WDR1/TPM4/MYH9/FBLIM1/ACTN4/TPM3	6
GO:0000778	condensed nuclear chromosome kinetochore	3/360	14/19659	0.00190781	0.0193961	0.0152529	CCNB1/BUB1/NDC80	3
GO:0002102	podosome	4/360	30/19659	0.00208003	0.0201858	0.0158739	WDR1/SH3PXD2B/TPM4/PTPN12	4
GO:0030140	trans-Golgi network transport vesicle	4/360	30/19659	0.00208003	0.0201858	0.0158739	TMED9/FURIN/ATP7A/IGF2R	4
GO:0101002	ficolin-1-rich granule	10/360	185/19659	0.00223676	0.0212244	0.0166907	PSMC2/GLB1/PGM2/CANT1/CD58/PYGL/ARPC5/PRDX4/PSMD12/PSMD11	10
GO:0000794	condensed nuclear chromosome	7/360	100/19659	0.00242964	0.0224501	0.0176546	HUS1/AURKA/CCNB1/BUB1/BRCA1/TUBG1/NDC80	7
GO:0031227	intrinsic component of endoplasmic reticulum membrane	9/360	157/19659	0.00247109	0.0224501	0.0176546	HSPA5/TBL2/SPPL2A/XBP1/TRAM1/DERL1/EXT1/ZMPSTE24/EMC1	9
GO:0030863	cortical cytoskeleton	7/360	102/19659	0.00271751	0.0241745	0.0190106	WDR1/CAPZA1/TPM4/MYH9/ACTN4/CALD1/HFE	7
GO:0005876	spindle microtubule	5/360	54/19659	0.00303628	0.026459	0.0208072	AURKA/KIF4A/SKA1/KIF18A/TUBG1	5
GO:0000776	kinetochore	8/360	133/19659	0.00315655	0.026957	0.0211988	CCNB1/ERCC6L/SKA1/CENPI/BUB1/SGO2/KIF18A/NDC80	8
GO:0001725	stress fiber	5/360	59/19659	0.00446303	0.0366483	0.0288199	TPM4/MYH9/FBLIM1/ACTN4/TPM3	5
GO:0097517	contractile actin filament bundle	5/360	59/19659	0.00446303	0.0366483	0.0288199	TPM4/MYH9/FBLIM1/ACTN4/TPM3	5
GO:0005838	proteasome regulatory particle	3/360	20/19659	0.00550853	0.0443801	0.0349001	PSMC2/PSMD12/PSMD11	3
GO:0000779	condensed chromosome, centromeric region	7/360	117/19659	0.00578983	0.0457825	0.036003	AURKA/CCNB1/ERCC6L/SKA1/BUB1/SGO2/NDC80	7
GO:0000242	pericentriolar material	3/360	21/19659	0.00634042	0.0492247	0.03871	NEDD1/TUBG1/DYRK3	3
GO:0035578	azurophil granule lumen	6/360	91/19659	0.00654085	0.049874	0.0392205	TXNDC5/GLB1/FUCA2/ANXA2/SDCBP/DNAJC3	6

## Sheet: MF terms
Sheet 3. 15 terms of molecular function (MF)
ID	Description	GeneRatio	BgRatio	pvalue	p.adjust	qvalue	geneID	Count
GO:0016758	transferase activity, transferring hexosyl groups	22/347	206/17632	1.26761e-10	7.46623e-08	6.73835e-08	RPN2/OSTC/KDELC2/DDOST/STT3A/EXT2/POFUT1/RPN1/COLGALT1/C1GALT1C1/ALG2/MAGT1/MGAT2/PLOD3/GALNT2/B3GNT5/PYGL/EXT1/DPY19L1/B4GALT5/CHPF2/DPM1	22
GO:0016757	transferase activity, transferring glycosyl groups	23/347	272/17632	4.82798e-09	1.42184e-06	1.28323e-06	RPN2/OSTC/KDELC2/DDOST/STT3A/EXT2/POFUT1/RPN1/COLGALT1/C1GALT1C1/ALG2/MAGT1/MGAT2/PLOD3/GALNT2/B3GNT5/PYGL/EXT1/QTRT2/DPY19L1/B4GALT5/CHPF2/DPM1	23
GO:0004576	oligosaccharyl transferase activity	6/347	10/17632	1.09357e-08	2.14705e-06	1.93773e-06	RPN2/OSTC/DDOST/STT3A/RPN1/MAGT1	6
GO:0016853	isomerase activity	14/347	147/17632	1.26518e-06	0.000186298	0.000168136	PDIA6/TXNDC5/PMM2/PPIC/PGM2/FKBP9/GNPDA1/ERP44/PDIA5/GALM/P4HB/PUS7/DKC1/RPIA	14
GO:0097153	cysteine-type endopeptidase activity involved in apoptotic process	5/347	15/17632	7.32345e-06	0.000862702	0.000778598	CASP7/CASP3/CASP8/CASP6/CASP2	5
GO:0005123	death receptor binding	5/347	17/17632	1.46089e-05	0.0014341	0.00129429	CASP3/MYD88/RIPK1/FADD/CASP8	5
GO:0050839	cell adhesion molecule binding	23/347	486/17632	0.000101556	0.0085452	0.00771213	HSPA5/MMP14/LDHA/MSN/ZC3HAV1/LRRC59/PTPN1/ADAM9/ANXA2/CAPZA1/TES/SH3GLB1/TAGLN2/ITGB1/MYH9/BZW1/ITGA5/ACTN4/CALD1/CAST/P4HB/SERBP1/VASP	23
GO:0015036	disulfide oxidoreductase activity	6/347	40/17632	0.000121392	0.00893752	0.00806621	PDIA6/PGK1/PDIA5/GSTK1/TMX1/P4HB	6
GO:0045296	cadherin binding	17/347	323/17632	0.000240637	0.0140602	0.0126895	HSPA5/LDHA/ZC3HAV1/LRRC59/PTPN1/ANXA2/CAPZA1/TES/SH3GLB1/TAGLN2/ITGB1/MYH9/BZW1/CALD1/CAST/SERBP1/VASP	17
GO:0016860	intramolecular oxidoreductase activity	6/347	46/17632	0.000268276	0.0140602	0.0126895	PDIA6/GNPDA1/ERP44/PDIA5/P4HB/RPIA	6
GO:0003756	protein disulfide isomerase activity	4/347	17/17632	0.000286457	0.0140602	0.0126895	PDIA6/ERP44/PDIA5/P4HB	4
GO:0016864	intramolecular oxidoreductase activity, transposing S-S bonds	4/347	17/17632	0.000286457	0.0140602	0.0126895	PDIA6/ERP44/PDIA5/P4HB	4
GO:0048029	monosaccharide binding	7/347	74/17632	0.000625288	0.0275506	0.0248647	LMAN1/PLOD3/P4HA1/PYGL/IGF2R/LMAN2L/RPIA	7
GO:0008378	galactosyltransferase activity	5/347	36/17632	0.000654852	0.0275506	0.0248647	COLGALT1/C1GALT1C1/PLOD3/B3GNT5/B4GALT5	5
GO:0016667	oxidoreductase activity, acting on a sulfur group of donors	6/347	58/17632	0.000951377	0.0373574	0.0337155	PDIA6/PGK1/PDIA5/GSTK1/TMX1/P4HB	6

## Sheet: KEGG terms
Sheet 4. KEGG terms
ID	Description	GeneRatio	BgRatio	pvalue	p.adjust	qvalue	geneID	Count
hsa04141	Protein processing in endoplasmic reticulum	20/180	166/7959	7.68554e-10	1.81379e-07	1.55329e-07	3309/10970/6185/10130/1650/81567/3703/6184/23193/9871/7184/3998/7494/23471/79139/578/8454/5034/51726/5611	20
hsa05130	Pathogenic Escherichia coli infection	18/180	202/7959	6.15772e-07	7.26611e-05	6.22254e-05	84790/9871/840/836/4615/4790/8737/4641/84617/382/8772/578/3688/4627/841/10092/51135/10061	18
hsa00510	N-Glycan biosynthesis	8/180	50/7959	1.3967e-05	0.00109874	0.000940933	6185/1650/3703/6184/23193/85365/4247/8813	8
hsa05145	Toxoplasmosis	11/180	112/7959	4.2116e-05	0.00215591	0.00184627	3915/836/4615/4790/3588/6774/3460/3688/841/2773/51135	11
hsa05133	Pertussis	9/180	76/7959	4.9006e-05	0.00215591	0.00184627	840/836/4615/4790/3688/353376/3678/2773/51135	9
hsa04210	Apoptosis	12/180	136/7959	5.48113e-05	0.00215591	0.00184627	84790/840/836/4790/8737/8772/578/841/839/835/84823/4893	12
hsa05170	Human immunodeficiency virus 1 infection	15/180	212/7959	8.57317e-05	0.00289038	0.00247526	891/836/4615/4790/85363/8737/8772/578/8454/841/2773/115004/4893/51135/27350	15
hsa05169	Epstein-Barr virus infection	14/180	201/7959	0.000175152	0.00516698	0.00442489	5701/836/4615/4790/8737/3065/965/6774/8772/578/841/5718/51135/5717	14
hsa00513	Various types of N-glycan biosynthesis	6/180	39/7959	0.000215938	0.00566236	0.00484913	6185/1650/3703/6184/85365/4247	6
hsa04215	Apoptosis - multiple species	5/180	32/7959	0.000686396	0.016199	0.0138724	840/836/8772/578/841	5
hsa05131	Shigellosis	14/180	236/7959	0.000892398	0.019146	0.0163962	4615/4790/8737/3688/8454/3678/64121/92610/81/831/10092/115004/8915/10627	14
hsa03030	DNA replication	5/180	36/7959	0.00119448	0.0234914	0.0201175	5558/5111/4172/4175/10714	5
